# Supplementary material for: Zika virus tropism during early infection of the testicular interstitium and its role in viral pathogenesis in the testes
Source: PubMed Central journal article supplement (PMC7331987; doi:10.1371/journal.ppat.1008601), 2020-07-02
Supplement: ppat.1008601.s001.pdf [file ppat.1008601.s001.pdf]

**A****ZIKV-NS3m**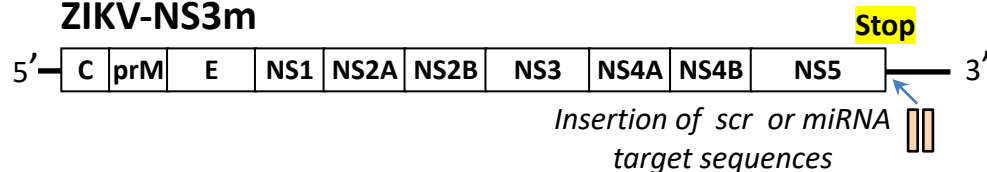**B****ZIKV-NS3m**

stop                      ↓                      ↓

                                         10                      20

**TAA**GCACCAATCTTAATGTTGTC

**2×*scr***

stop                                              *scr*                                              NsiI                                              *scr*

**TAA**GCACCAAT**cagcagacttcttcaagtc***ATGCAT*TACCAATCTTAAT**cagcagacttcttcaagtc**TGTTGTC

**2×511(T)**

stop                                              mir-511-3p(T)                                              NsiI                                              mir-511-3p(T)

**TAA**GCACCA**ATcctgtccttttgctacacatt***ATGCAT*TACCAATCTTA**ATcctgtccttttgctacacat**TGTTGTC
