# Supplementary material for: Zika virus tropism during early infection of the testicular interstitium and its role in viral pathogenesis in the testes
Source: PubMed Central journal article supplement (PMC7331987; doi:10.1371/journal.ppat.1008601), 2020-07-02
Supplement: ppat.1008601.s003.pdf [file ppat.1008601.s003.pdf]

# 2x511(T)

stop                      mir-511-3p(T)                                      mir-511-3p(T)  
TAA GCACCA ATcctgtc ttttgctacacatt ATGCATACCAATCTTA ATcctgtc ttttgctacacat TGTTGTC

## Mouse #5

Serum 1 dpi (miRNA targets are stable)

Titer = 6.0  
log<sub>10</sub>pfu/mL

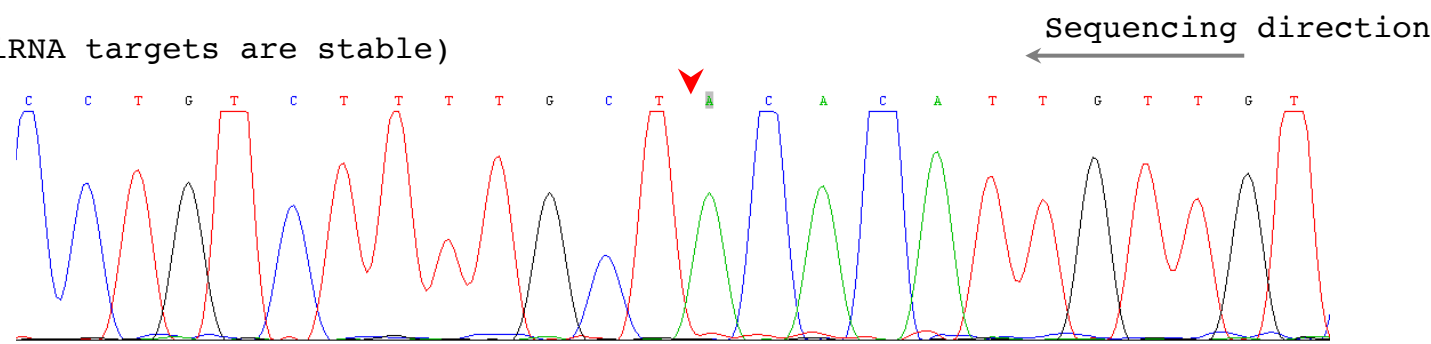

Brain 12dpi (miRNA targets are stable)

Titer = 5.7  
log<sub>10</sub>pfu/g

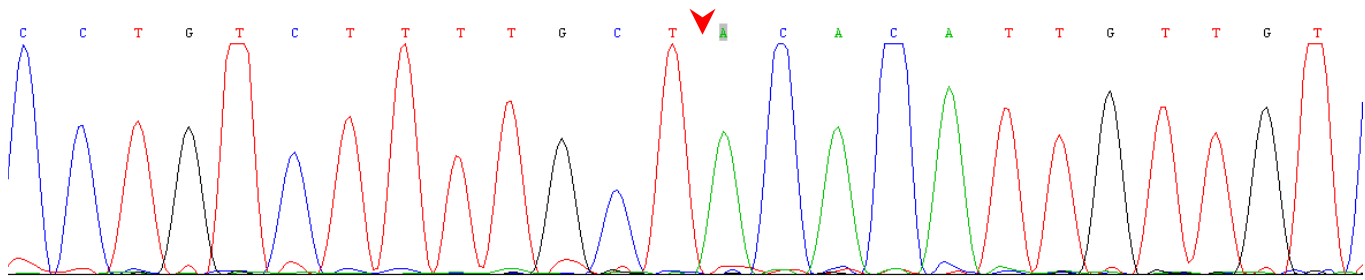

Testis 12 dpi (40 nt deletion in the region of miRNA targets insertion)

Titer = 5.6  
log<sub>10</sub>pfu/g

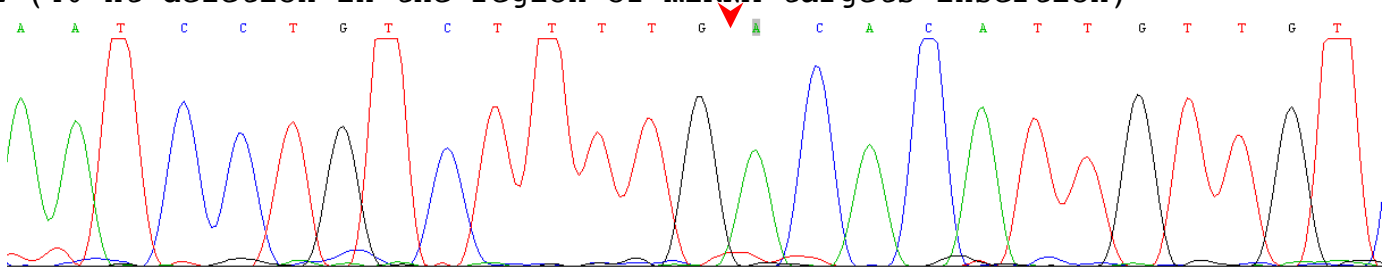

stop                      mir-511-3p(T)                                      mir-511-3p(T)  
TAA GCACCA ATcctgtc ttttgctacacatt ATGCATACCAATCTTA ATcctgtc ttttgctacacat TGTTGTC

40 nt deletion
