# Supplementary material for: Zika virus tropism during early infection of the testicular interstitium and its role in viral pathogenesis in the testes
Source: PubMed Central journal article supplement (PMC7331987; doi:10.1371/journal.ppat.1008601), 2020-07-02

# 15P1 Cells form a Functional Barrier

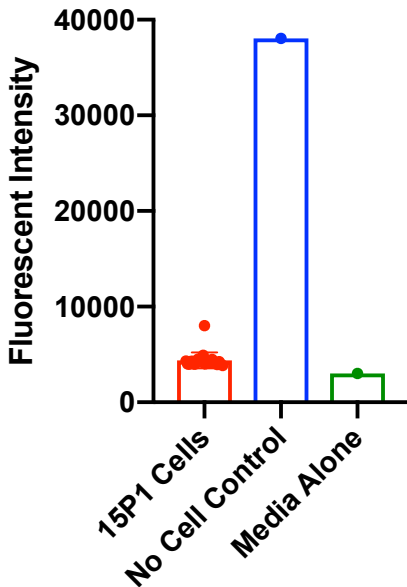

Supplement: ppat.1008601.s005.pdf [file ppat.1008601.s005.pdf]
