# Supplementary material for: Zika virus tropism during early infection of the testicular interstitium and its role in viral pathogenesis in the testes
Source: PubMed Central journal article supplement (PMC7331987; doi:10.1371/journal.ppat.1008601), 2020-07-02

**A****ZIKV-NS3m**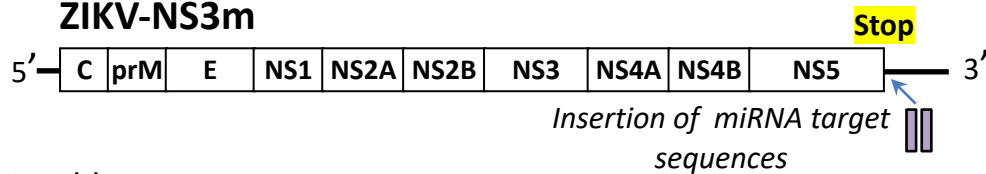**2×142(T)**

stop

mir-142-3p(T)

NsiI

mir-142-3p(T)

TAA GCACCA Tccataaagtaggaaacactac ATGCATACCAATCTTA Tccataaagtaggaaacactaca TGTTG

**B**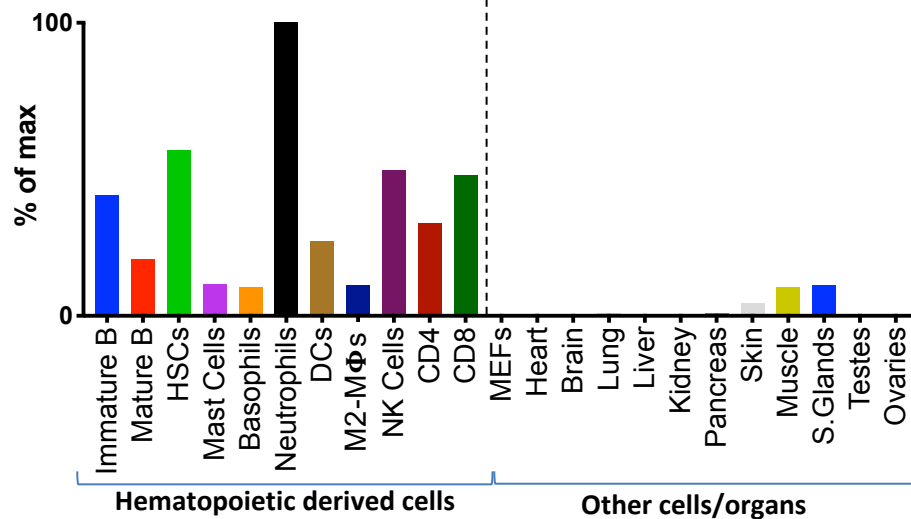**C**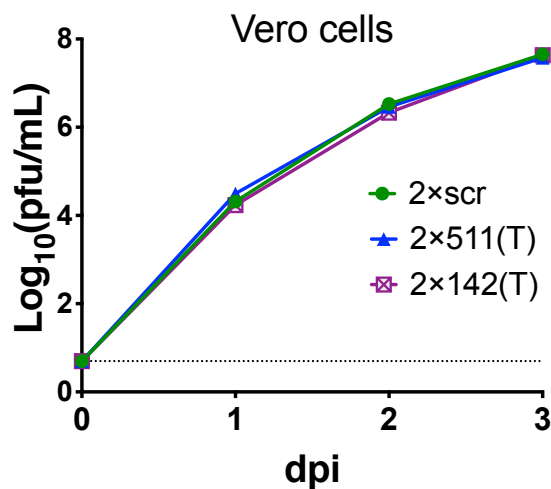**D**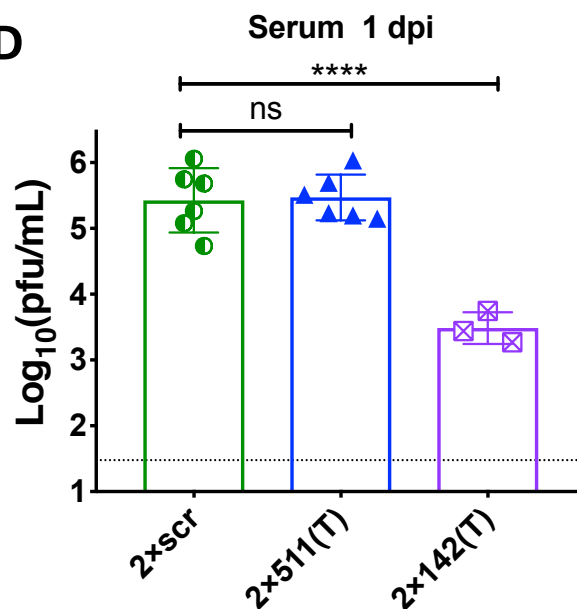

Supplement: ppat.1008601.s007.pdf [file ppat.1008601.s007.pdf]
